# Supplementary material
Source: PubMed Central journal article supplement (PMC2752065)
Supplement: JCI37978sd.pdf [file JCI37978sd.pdf]

**Figure S1**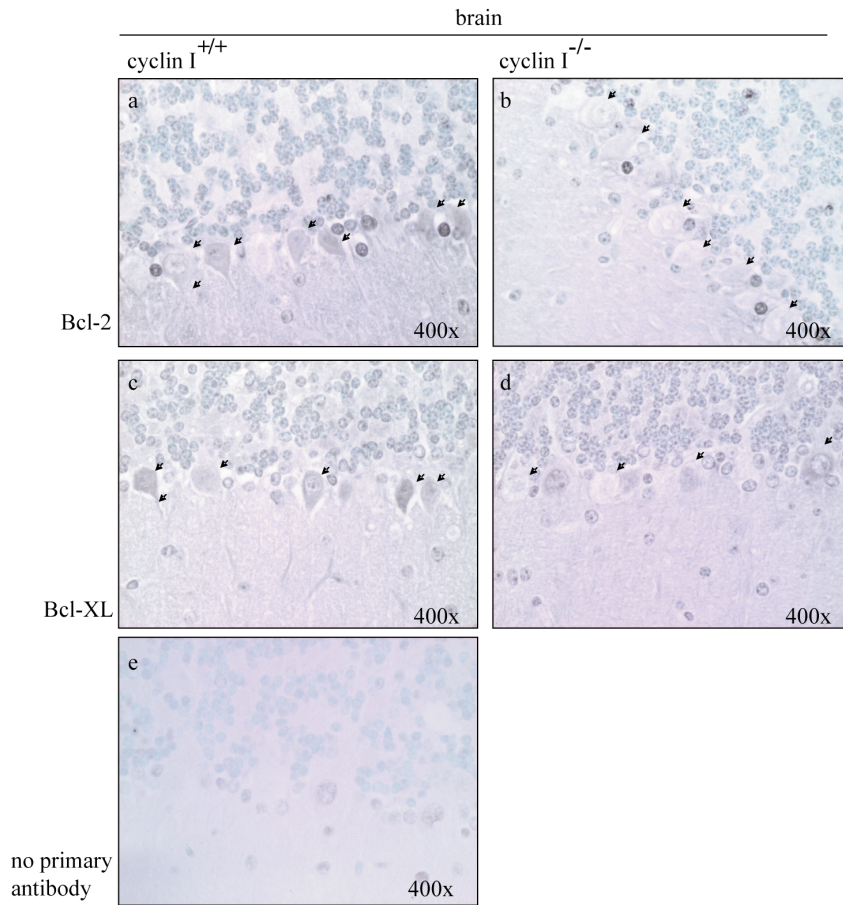

**Figure S1.** *Cyclin I regulates specific Bcl-2 family proteins in brain tissue.*

Immunostaining for Bcl-2 (a) and Bcl-XL (c) was detected in the cerebellum of cyclin I wildtype mice. In contrast, staining for Bcl-2 (b) and Bcl-XL (d) was markedly decreased in brain tissue from cyclin I null mice (representative examples indicated by arrows).

**Figure S2**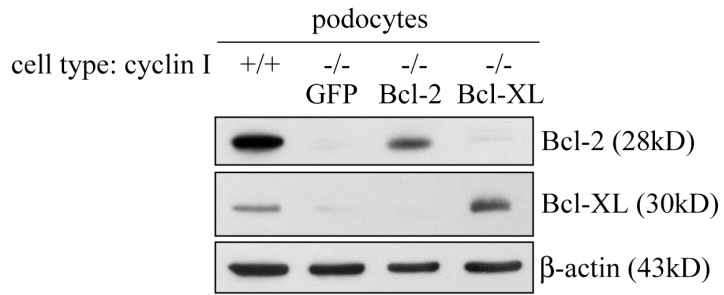

**Figure S2.** Restoring *Bcl-2* and *Bcl-XL* expression in cyclin I null podocytes.

Cyclin I null podocytes were stably infected with retroviral plasmids encoding human Bcl-2, Bcl-XL or GFP. After 14 days of growth restriction protein lysates were obtained and analyzed by Western blot for expression of Bcl-2, Bcl-XL and  $\beta$ -actin.

**Figure S3**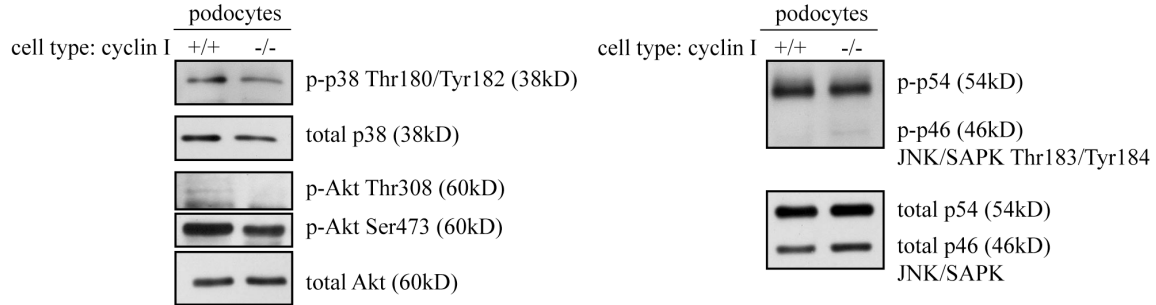

***Figure S3.*** Cyclin I does not regulate activation of p38, JNK/SAPK or AKT.

Protein was harvested from cultured wildtype and cyclin I null podocytes and analyzed by Western blot and subsequent immunostaining for p-p38 Thr180/Tyr182, p-Akt Thr308 and Ser473 and pJNK/SAPK Thr 183/Tyr184. There were no obvious differences in p38, Akt or JNK/SAPK activation in the absence of cyclin I.

| <b>Table S1: Primary Antibodies</b> |                 |                      |                      |                          |                   |
|-------------------------------------|-----------------|----------------------|----------------------|--------------------------|-------------------|
| <b>Target Protein</b>               | <b>Antibody</b> | <b>Dilution (WB)</b> | <b>Dilution (IP)</b> | <b>Dilution (IHC/IF)</b> | <b>Source</b>     |
| β-actin                             | ab6276          | 1:100,000            | -                    | -                        | Abcam             |
| p-AKT (Thr308)                      | CST-2965        | 1:1,000              | -                    | 1:150                    | Cell Signaling    |
| p-AKT (Ser473)                      | CST-4060        | 1:1,000              | -                    | -                        | Cell Signaling    |
| total Akt                           | CST-4691        | 1:1,000              | -                    | -                        | Cell Signaling    |
| Bax                                 | CST-2772        | 1:1,000              | -                    | -                        | Cell Signaling    |
| Bcl-2                               | CST-2876        | 1:1,000              | -                    | 1:150                    | Cell Signaling    |
| Bcl-XL                              | CST-2762        | 1:1,000              | -                    | 1:150                    | Cell Signaling    |
| caspase 3                           | CST-9665        | 1:1,000              | -                    | -                        | Cell Signaling    |
| cleaved caspase 3 (Asp175)          | CST-9664        | -                    | -                    | 1:200                    | Cell Signaling    |
| Cdk5                                | MS-1059-P1      | 1:500                | -                    | -                        | Thermo Scientific |
| cyclin I                            | 15-288-22274    | -                    | 15μg                 | -                        | GenWay Biotech    |
| p-ERK1/2 (Thr202/Tyr204)            | CST-9101        | 1:1,000              | -                    | 1:150                    | Cell Signaling    |
| total ERK1/2                        | CST-9102        | 1:1,000              | -                    | -                        | Cell Signaling    |
| GAPDH                               | ab8245          | 1:3,000              | -                    | -                        | Abcam             |
| HA-tag                              | sc-7392         | 1:200                | 2μg                  | -                        | Santa Cruz        |
| p-JNK/SPAK (Thr183/Tyr184)          | CST-4688        | 1:1,000              | -                    | -                        | Cell Signaling    |
| total JNK/SAPK                      | CST-9258        | 1:1,000              | -                    | -                        | Cell Signaling    |
| p-MEK1/2 (Ser217/221)               | CST-9154        | 1:1,000              | -                    | -                        | Cell Signaling    |
| total MEK ½                         | CST-9154        | 1:1,000              | -                    | -                        | Cell Signaling    |
| myc-tag                             | CST-2276        | 1:1,000              | -                    | -                        | Cell Signaling    |
| myc-tag                             | Pro-Found 23620 | -                    | 5μg                  | -                        | Thermo Fisher     |
| myc-tag                             | 9E10            | -                    | 2μg                  | -                        | Santa Cruz        |
| Nephrin                             | RDI-PROGN2      | 1:200                | -                    | 1:100                    | Fitzgerald        |
| p-p38 (Thr180/Tyr182)               | CST-9215        | 1:1,000              | -                    | -                        | Cell Signaling    |
| total p38                           | CST-9212        | 1:1,000              | -                    | -                        | Cell Signaling    |
| p-A-Raf (Ser299)                    | CST-4431        | 1:1,000              | -                    | -                        | Cell Signaling    |
| total A-Raf                         | CST-4432        | 1:1,000              | -                    | -                        | Cell Signaling    |
| p-B-Raf (Ser445)                    | CST-2696        | 1:1,000              | -                    | -                        | Cell Signaling    |
| total B-Raf                         | CST-9434        | 1:1,000              | -                    | -                        | Cell Signaling    |
| p-c-Raf (Ser338)                    | CST-9427        | 1:1,000              | -                    | -                        | Cell Signaling    |
| p-c-Raf (Ser289/296/301)            | CST-9431        | 1:1,000              | -                    | -                        | Cell Signaling    |
| p-c-Raf (Ser259)                    | CST-9421        | 1:1,000              | -                    | -                        | Cell Signaling    |
| total c-Raf                         | CST-9422        | 1:1,000              | -                    | -                        | Cell Signaling    |
| Synaptopodin                        | RDI-PRO65194    | -                    | -                    | 1:1                      | Fitzgerald        |

| <b>Table S2: siRNAs</b> |                    |                             |               |
|-------------------------|--------------------|-----------------------------|---------------|
| <b>siRNA</b>            | <b>Target mRNA</b> | <b>Strand sequence</b>      | <b>Source</b> |
| AM16704/160139          | Cdk5               | 5'-GCUAGUUAGAACCUCGUtt-3'   | Ambion        |
| AM16704/60726           | Cdk5               | 5'-GGACCUGAAGAAAUAUUUCtt-3' | Ambion        |
| 4390771/s63800          | p35                | 5'-CAAGUGUUCUCUGACUUGAtt-3' | Ambion        |
| 4390771/s63801          | p35                | 5'-GGACCAGGGUUUCAUCACAtt-3' | Ambion        |
| 4390771/s63802          | p35                | 5'-GGUAGAGAGCUGUAAGGAAtt-3' | Ambion        |
| AM4611                  | non-targeting      |                             | Ambion        |

| <b>Table S3: qPCR primer probes (FAM reporter dye)</b> |                    |                           |                    |
|--------------------------------------------------------|--------------------|---------------------------|--------------------|
| <b>Primer probe</b>                                    | <b>Target mRNA</b> | <b>Strand sequence</b>    | <b>Source</b>      |
| Mm00477631_m1                                          | Bcl-2              | ATAACGGAGGCTGGGATGCCTTTGT | Applied Biosystems |
| Mm00437783_m1                                          | Bcl-XL             | GAACGGCGGCTGGGACACTTTTGTG | Applied Biosystems |
| 4352933E                                               | $\beta$ -actin     |                           | Applied Biosystems |
| Mm00432437_m1                                          | Cdk5               | GAAGATTGGGGAAGGCACCTATGGA | Applied Biosystems |
| Mm00438148_s1                                          | p35                | ACCTTGCGCGAACCCAAAAGATGCA | Applied Biosystems |
